# Supplementary material
Source: MDPI journal article supplement (https://www.mdpi.com/0718-1876/18/1/16)
Supplement: s1 [file s1]

## Appendix

**Table S1. Literature review of specific affordances identified in prior literature**

| <b>The affordance perspective in e-commerce</b>        |                                                                               |                                             |                    |
|--------------------------------------------------------|-------------------------------------------------------------------------------|---------------------------------------------|--------------------|
| Research context<br>(Authors)                          | Utilitarian affordance                                                        | Social affordance                           | Hedonic affordance |
| Social commerce<br>(Dong and Wang, 2018)               | visibility, meta-voicing, triggered attending, guidance shopping, and trading | social connecting                           |                    |
| Social commerce<br>(Tuncer, 2021)                      | visibility, meta-voicing, guidance shopping                                   |                                             |                    |
| Social commerce<br>(Lin et al., 2020)                  |                                                                               | interactivity, recommendation, and feedback |                    |
| Social commerce<br>(Tang and Zhang, 2020)              | utilitarian affordance                                                        | connective affordance                       | hedonic affordance |
| Live streaming commerce (Sun et al., 2019)             | IT affordance: visibility, meta-voicing, guidance shopping                    |                                             |                    |
| Live streaming commerce (Xu et al., 2022)              | live Streaming affordance                                                     |                                             |                    |
| IoT commerce<br>(Bayer et al., 2020)                   | context-aware services, automated customer processes                          | natural interactions,                       |                    |
| <b>The affordance perspective in gamification</b>      |                                                                               |                                             |                    |
| Enterprise collaboration system (Suh and Wagner, 2017) | rewardability, competition, and visibility of achievement                     |                                             |                    |
| Crowdsourcing participation<br>(Feng et al., 2018)     | point rewarding and                                                           | feedback giving                             |                    |
| Environmental conservation (Du et al., 2020)           | autonomy support, visibility of achievement, competition,                     | interactivity                               |                    |
| Workplace (Suh                                         | reward, status,                                                               | self-expression                             |                    |

|                                                               |                                    |                 |  |
|---------------------------------------------------------------|------------------------------------|-----------------|--|
| et al., 2017)                                                 | competition                        |                 |  |
| Mobile intelligence and wearable computing (Jin et al., 2020) | potential affordance as moderator  |                 |  |
| Online travel agencies (Shi et al., 2022)                     | achievement, identity, competition | self-expression |  |

**Table S2: Measurements**

| Constructs                    | Measurement items                                                               | Mean  | S. D. | Reference                  |
|-------------------------------|---------------------------------------------------------------------------------|-------|-------|----------------------------|
| <b>Monetary rewardability</b> | Gamification in online shopping offers me the possibility to:                   |       |       |                            |
|                               | REW1 obtain red pocket as a reward.                                             | 4.009 | 0.047 | (Suh et al., 2017)         |
|                               | REW2 get coupons when buying products.                                          | 4.113 | 0.049 |                            |
|                               | REW3 buy products at a lower price.                                             | 4.165 | 0.046 |                            |
| <b>Connectiveness</b>         | Gamification in online shopping allows me to:                                   |       |       |                            |
|                               | CON1 connect with my friends in the game task more frequently.                  | 3.646 | 0.059 | (Dong and Wang, 2018)      |
|                               | CON 2 connect and invite my friends to participate in gamified activities.      | 3.561 | 0.062 |                            |
|                               | CON 3 share the fun of gamified activities with my friends.                     | 3.552 | 0.067 |                            |
|                               | CON 4 interacting with my friends in the game task.                             | 3.519 | 0.073 |                            |
|                               | CON 5 maintain close social relationships with my friends in the game task.     | 3.533 | 0.071 |                            |
| <b>Playfulness</b>            | Gamification in online shopping:                                                |       |       |                            |
|                               | PLY1 offers me enjoyable shopping activities.                                   | 3.208 | 0.060 | (Feng et al., 2018)        |
|                               | PLY2 provides funny and interesting gamified activities.                        | 3.108 | 0.070 |                            |
|                               | PLY3 offers some gamified tasks which are true joys.                            | 3.245 | 0.069 |                            |
|                               | PLY4 not brings me a lot of fun. (reverse)                                      | 3.321 | 0.073 |                            |
| <b>Novelty</b>                | Gamification in online shopping:                                                |       |       |                            |
|                               | NV1 offers unique shopping experiences.                                         | 3.807 | 0.050 | (McLean and Wilson, 2019)  |
|                               | NV2 provide different effects and novel functions in games                      | 3.788 | 0.057 |                            |
|                               | NV3 provide several novel game elements and afford special purchase activities. | 3.684 | 0.056 |                            |
|                               | NV4 offer me various and new games during shopping processes.                   | 3.580 | 0.061 |                            |
| <b>Immersive experience</b>   | While I playing games during online shopping process:                           |       |       |                            |
|                               | IE1 I am immersed in the gamified tasks that I am performing                    | 3.439 | 0.059 | (Daassi and Debbabi, 2021) |
|                               | IE2 The gamified activities make me forget the reality of the outside world.    | 3.080 | 0.069 |                            |
|                               | IE3 I am absorbed in what I was playing.                                        | 3.311 | 0.065 |                            |
|                               | IE4 My mind is immersed in the world of games.                                  | 3.274 | 0.068 |                            |

| Constructs         | Measurement items |                                              | Mean  | S. D. | Reference            |
|--------------------|-------------------|----------------------------------------------|-------|-------|----------------------|
| Purchase intention | PI1               | I consider purchasing this product.          | 4.090 | 0.052 | (Zhang et al., 2020) |
|                    | PI2               | I have a desire to buy more products.        | 3.741 | 0.062 |                      |
|                    | PI3               | I have the inclination to purchase products. | 3.712 | 0.055 |                      |

Table S3. Demographic distribution (N=212)

|                                                                     | Demographic variable    | Frequency | Percentage |
|---------------------------------------------------------------------|-------------------------|-----------|------------|
| Gender                                                              | Male                    | 73        | 34.4       |
|                                                                     | Female                  | 139       | 65.6       |
| Age                                                                 | Less than 20            | 21        | 9.9%       |
|                                                                     | 21~25                   | 112       | 52.8%      |
|                                                                     | 26~30                   | 61        | 28.8%      |
|                                                                     | Above 30                | 18        | 8.5%       |
| Education Background                                                | Below undergraduate     | 27        | 12.8%      |
|                                                                     | Undergraduate           | 116       | 54.7%      |
|                                                                     | Postgraduation or above | 68        | 32.5%      |
|                                                                     | Less than 1 years       | 58        | 27.4%      |
| How long have you been experienced gamification in online shopping? | 1~2 years               | 108       | 50.9%      |
|                                                                     | 3~4 years               | 36        | 17.0%      |
|                                                                     | Above 4 years           | 10        | 4.7%       |

Table S4. CMV-CLC results

| Relationships                        | CLC Estimation<br>(Path coefficients)<br>β0 | Original PLS                              |                                | Original PLS<br>Estimates<br>(t-value) | Difference<br>(β1-β0) |
|--------------------------------------|---------------------------------------------|-------------------------------------------|--------------------------------|----------------------------------------|-----------------------|
|                                      |                                             | Estimates<br>(Path<br>coefficients)<br>β1 | CLC<br>Estimation<br>(t-value) |                                        |                       |
|                                      |                                             |                                           |                                |                                        |                       |
| Connectiveness~ Immersive experience | 0.094                                       | 0.093                                     | 1.85                           | 1.88                                   | 0.001                 |
| Playfulness ~ Immersion              | 0.241                                       | 0.239                                     | 3.45***                        | 3.60***                                | 0.002                 |
| Novelty ~ immersion                  | 0.188                                       | 0.189                                     | 3.07***                        | 3.08***                                | 0.001                 |
| Monetary rewardability ~ Immersion   | 0.437                                       | 0.437                                     | 7.95***                        | 8.26***                                | 0.000                 |
| Immersion~ Purchase intention        | 0.560                                       | 0.562                                     | 11.85***                       | 12.07***                               | 0.002                 |

Table S5. Reliability and Convergent Validity

| Loading              | Estimate | Std. error | t-stat. | p-value | 95% Confidence Interval |       | AVE   | Cronbach's alpha | Dillon–Goldstein's ρ |
|----------------------|----------|------------|---------|---------|-------------------------|-------|-------|------------------|----------------------|
| Connectiveness (CO1) | 0.860    | 0.023      | 37.156  | 0.000   | 0.809                   | 0.898 | 0.709 | 0.897            | 0.924                |
| CO 2                 | 0.864    | 0.027      | 32.457  | 0.000   | 0.806                   | 0.909 |       |                  |                      |
| CO 3                 | 0.801    | 0.048      | 16.883  | 0.000   | 0.691                   | 0.871 |       |                  |                      |
| Playfulness (PL1)    | 0.890    | 0.015      | 61.337  | 0.000   | 0.861                   | 0.917 | 0.791 | 0.912            | 0.938                |

|                                    |       |       |        |       |       |       |       |       |       |
|------------------------------------|-------|-------|--------|-------|-------|-------|-------|-------|-------|
| PL 2                               | 0.886 | 0.018 | 50.570 | 0.000 | 0.847 | 0.915 |       |       |       |
| PL 3                               | 0.890 | 0.015 | 60.137 | 0.000 | 0.859 | 0.916 |       |       |       |
| PL 4                               | 0.891 | 0.014 | 64.175 | 0.000 | 0.862 | 0.916 |       |       |       |
| Novelty (NV1)                      | 0.844 | 0.024 | 35.905 | 0.000 | 0.790 | 0.881 |       |       |       |
| NV 2                               | 0.797 | 0.035 | 22.689 | 0.000 | 0.713 | 0.855 | 0.685 | 0.847 | 0.897 |
| NV 3                               | 0.838 | 0.025 | 34.021 | 0.000 | 0.784 | 0.880 |       |       |       |
| NV 4                               | 0.830 | 0.021 | 38.872 | 0.000 | 0.783 | 0.867 |       |       |       |
| Monetary<br>rewardability<br>(RE1) | 0.809 | 0.029 | 27.686 | 0.000 | 0.745 | 0.859 |       |       |       |
| RE 2                               | 0.836 | 0.020 | 41.345 | 0.000 | 0.795 | 0.874 | 0.709 | 0.798 | 0.881 |
| RE 3                               | 0.859 | 0.023 | 37.680 | 0.000 | 0.810 | 0.898 |       |       |       |
| RE 4                               | 0.872 | 0.019 | 47.112 | 0.000 | 0.832 | 0.904 |       |       |       |
| RE 5                               | 0.833 | 0.025 | 33.985 | 0.000 | 0.780 | 0.876 |       |       |       |
| Immersive<br>experience (IM1)      | 0.880 | 0.015 | 59.784 | 0.000 | 0.850 | 0.908 |       |       |       |
| IM 2                               | 0.852 | 0.022 | 38.798 | 0.000 | 0.801 | 0.889 | 0.740 | 0.883 | 0.919 |
| IM 3                               | 0.870 | 0.020 | 44.571 | 0.000 | 0.827 | 0.904 |       |       |       |
| IM 4                               | 0.837 | 0.026 | 32.600 | 0.000 | 0.783 | 0.881 |       |       |       |
| Purchase Intention<br>(PI1)        | 0.741 | 0.048 | 15.405 | 0.000 | 0.626 | 0.815 |       |       |       |
| PI2                                | 0.821 | 0.026 | 32.212 | 0.000 | 0.765 | 0.863 | 0.654 | 0.812 | 0.851 |
| PI3                                | 0.859 | 0.020 | 43.849 | 0.000 | 0.814 | 0.891 |       |       |       |

**Table S6. Heterotrait-monotrait ratio of correlations matrix (HTMT matrix)**

|                           | Connectiveness | Playfulness | Novelty | Monetary<br>rewardability | Immersive<br>experience | Purchase<br>Intention |
|---------------------------|----------------|-------------|---------|---------------------------|-------------------------|-----------------------|
| Connectiveness            |                |             |         |                           |                         |                       |
| Playfulness               | 0.289          |             |         |                           |                         |                       |
| Novelty                   | 0.412          | 0.677       |         |                           |                         |                       |
| Monetary<br>rewardability | 0.518          | 0.431       | 0.505   |                           |                         |                       |
| Immersive<br>experience   | 0.477          | 0.610       | 0.638   | 0.732                     |                         |                       |
| Purchase Intention        | 0.516          | 0.285       | 0.479   | 0.591                     | 0.669                   |                       |

**Table S7. Fornell-Larcker matrix**

|                | Connectiveness | Playfulness | Novelty | Monetary<br>rewardability | Immersive<br>experience | Purchase<br>Intention |
|----------------|----------------|-------------|---------|---------------------------|-------------------------|-----------------------|
| Connectiveness | <b>0.709</b>   |             |         |                           |                         |                       |

|                    |       |              |              |              |              |              |
|--------------------|-------|--------------|--------------|--------------|--------------|--------------|
| Playfulness        | 0.062 | <b>0.791</b> |              |              |              |              |
| Novelty            | 0.115 | 0.359        | <b>0.685</b> |              |              |              |
| Monetary           |       |              |              |              |              |              |
| rewardability      | 0.198 | 0.159        | 0.200        | <b>0.709</b> |              |              |
| Immersive          |       |              |              |              |              |              |
| experience         | 0.169 | 0.302        | 0.313        | 0.434        | <b>0.740</b> |              |
| Purchase Intention | 0.149 | 0.066        | 0.152        | 0.244        | 0.316        | <b>0.654</b> |

---
